# Supplementary material
Source: PubMed Central journal article supplement (PMC5479581)
Supplement: NIHMS868204-supplement-Supplemental.pdf [file NIHMS868204-supplement-Supplemental.pdf]

**Supporting Information**

**A “Beheaded” TAML Activator: A Compromised Catalyst that Emphasizes the Linearity  
between Catalytic Activity and  $pK_a$**

Matthew R. Mills, Andrew C. Weitz, David Z. Zhang, Michael P. Hendrich, Alexander D.  
Ryabov, Terrence J. Collins\*

Department of Chemistry, Carnegie Mellon University, 4400 Fifth Avenue, Pittsburgh, Pennsylvania 15213, United  
States

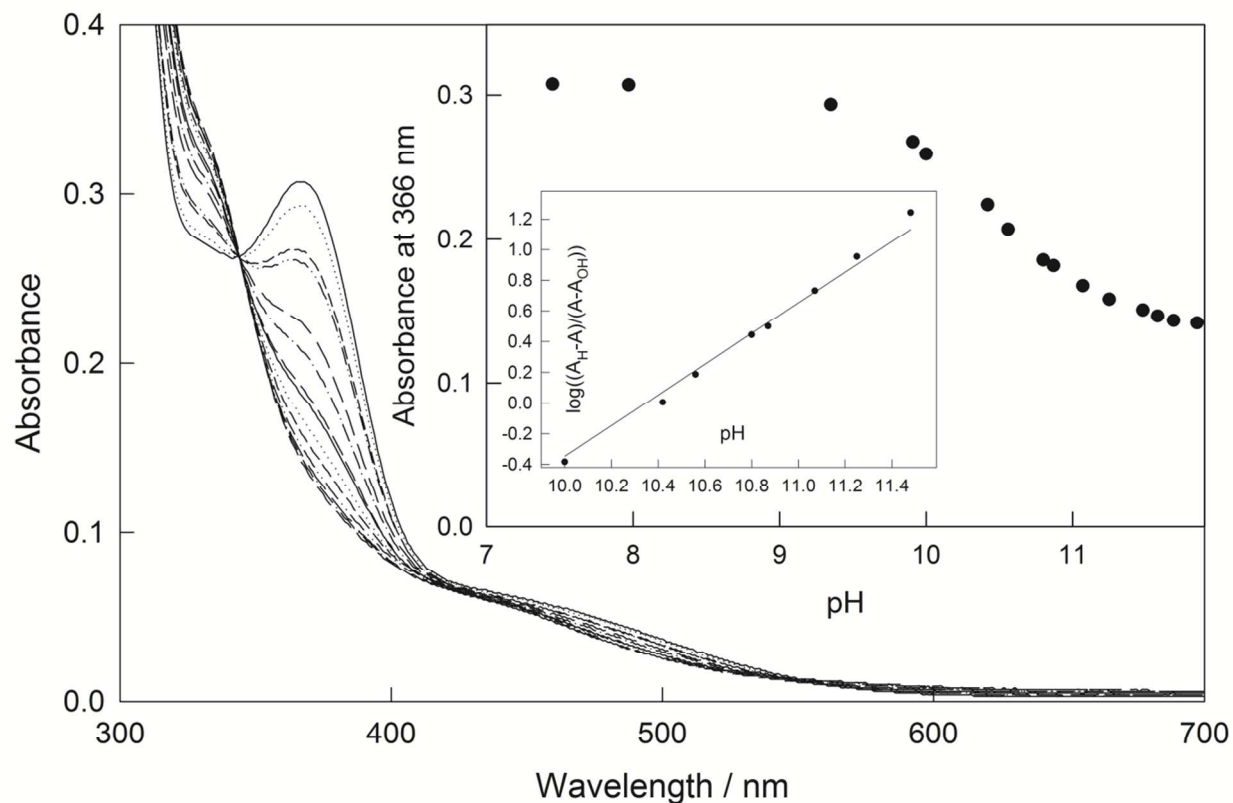

**Figure S1.** Titration of TAML Activator **1b**: spectral changes in the pH range of 7-12. Inset shows absorbance at 366 nm versus pH and linearization of the data using eq 2 in the main text. Conditions:  $5 \times 10^{-5}$  M **1b**, 25 °C, Carmody buffer. <sup>S1</sup>

#### References:

S1. Catalyst **1b** was synthesized according to this reference: Hangun, Y. Design and Study of Catalytic Activators of Hydrogen Peroxide Promising Rapid Efficient Petroleum Desulfurization and Bleaching Technologies. Ph.D. Thesis, Carnegie Mellon University, Pittsburgh PA, 2002.
